# Supplementary material for: The association between immune-related adverse events and survival outcomes in Asian patients with advanced melanoma receiving anti-PD-1 antibodies
Source: PubMed Central journal article supplement (PMC7579996; doi:10.1186/s12885-020-07508-7), 2020-10-21
Supplement: 12885_2020_7508_MOESM1_ESM.pdf [file 12885_2020_7508_MOESM1_ESM.pdf]

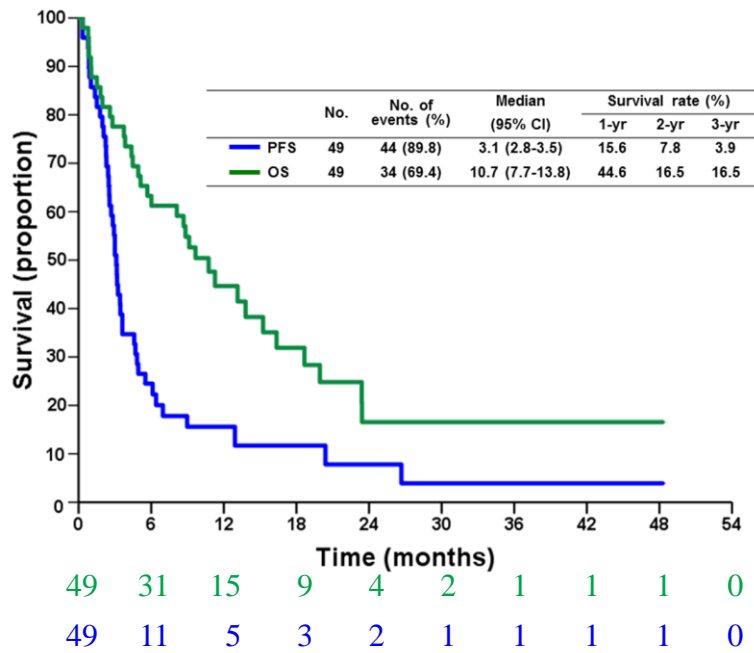

**Supplementary Figure S1. Progression-free survival (PFS) and overall survival (OS) in melanoma patients receiving anti-PD-1 antibodies.** The numbers below the charts correspond to patients at risk at each time point.

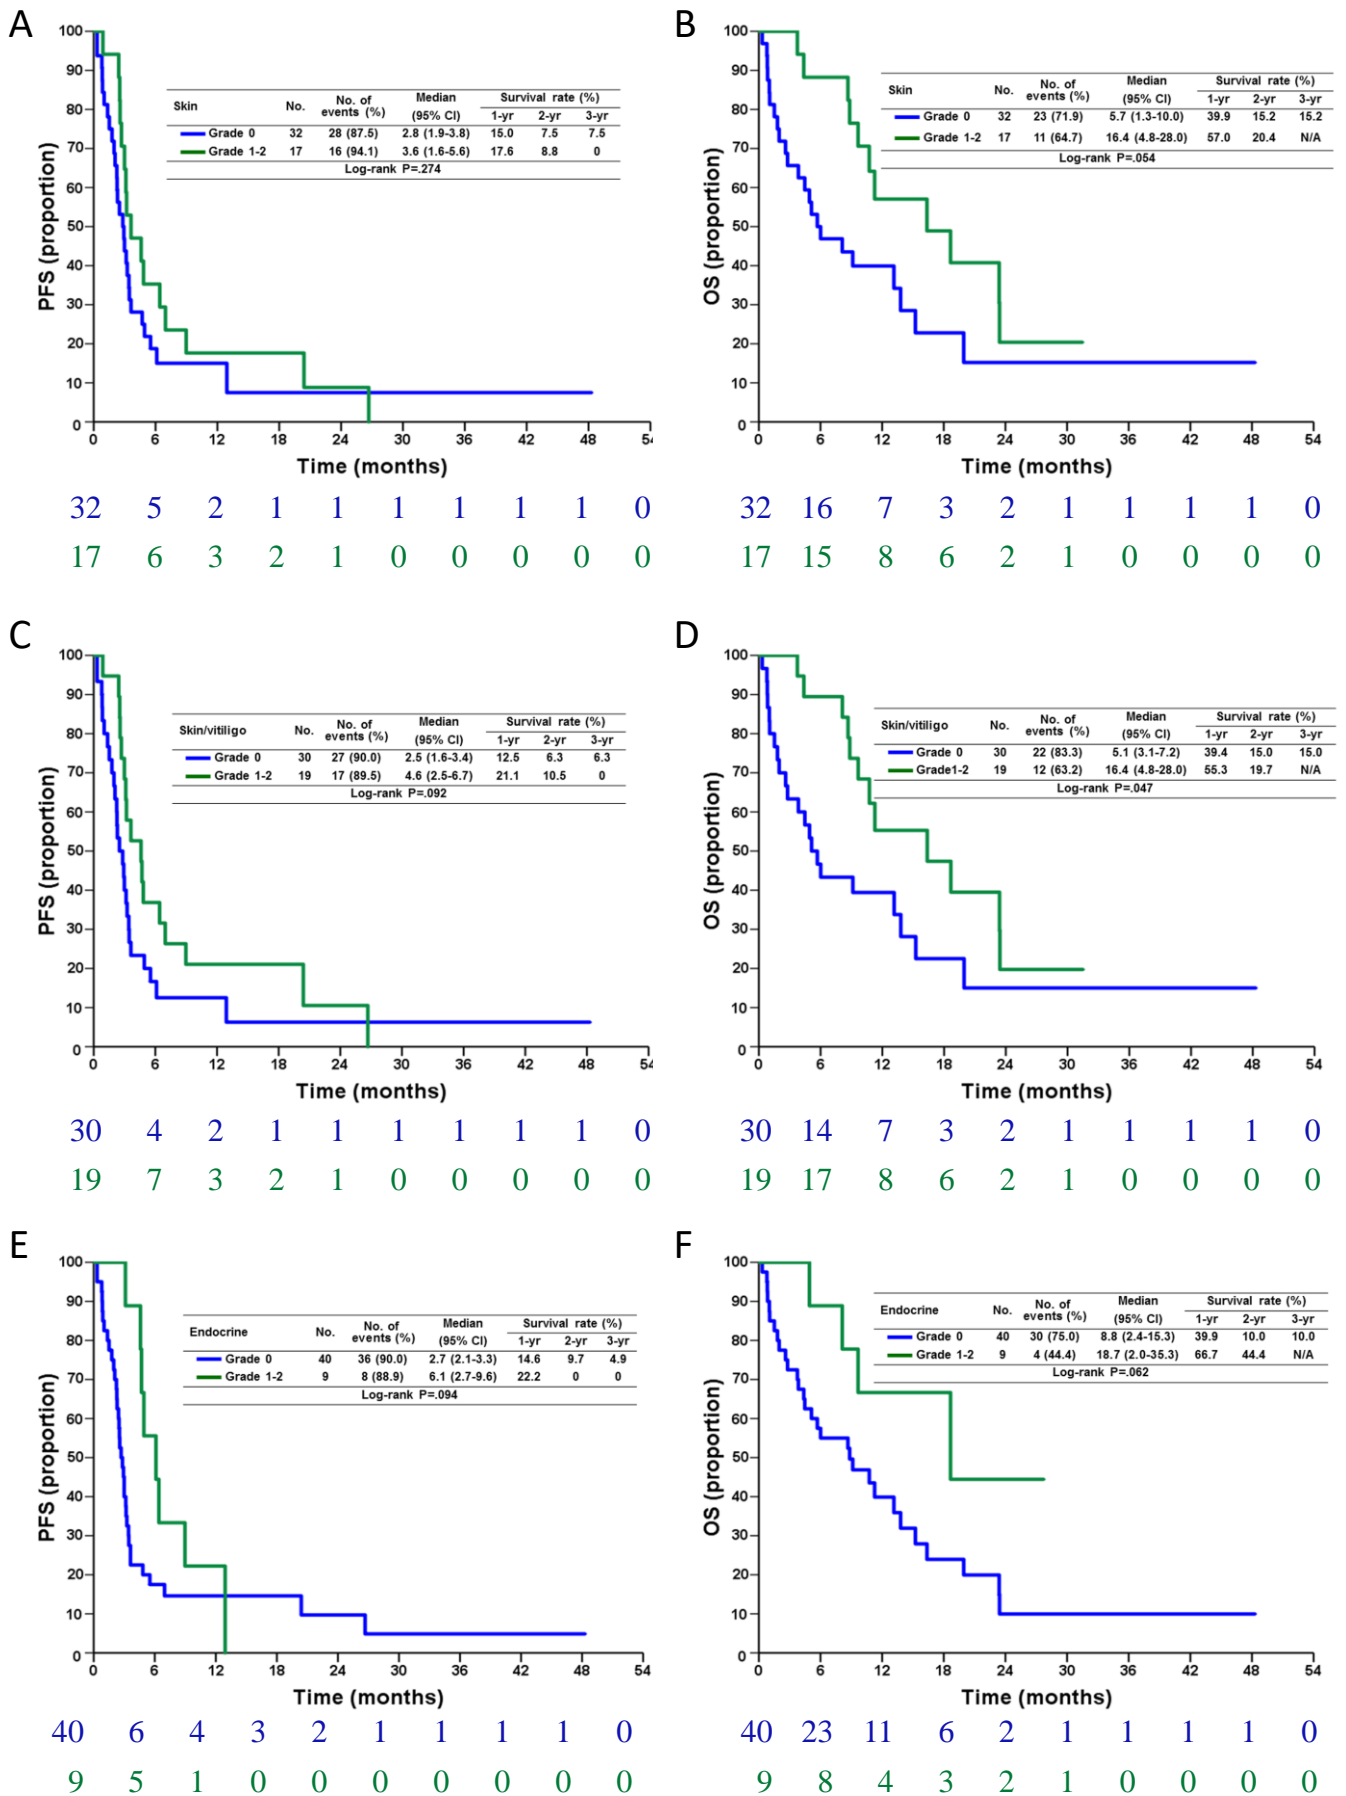

**Supplementary Figure S2. Progression-free survival (PFS) (A, C, E) and overall survival (OS) (B, D, F) in melanoma patients receiving anti-PD-1 antibodies, who had skin (A, B), vitiligo (C, D), and endocrine (E, F) irAEs**

The patients experiencing skin/vitiligo (C,  $p = 0.092$ ) and endocrine (E,  $p = 0.094$ ) irAEs showed a trend of favorable PFS. The patients experiencing skin ( $p = 0.054$ ), vitiligo ( $p = 0.047$ ), and endocrine ( $p = 0.062$ ) irAEs had a trend of favorable OS. The numbers below the charts correspond to patients at risk at each time point.

irAEs, immune-related adverse events
